# Supplementary material for: NGM282 Improves Liver Fibrosis and Histology in 12 Weeks in Patients With Nonalcoholic Steatohepatitis
Source: PubMed Central journal article supplement — Hepatology. 2019 Apr 10;71(4):1198–212. doi: 10.1002/hep.30590 (PMC7187438; doi:10.1002/hep.30590), 2019-04-10
Supplement: HEP-71-1198-s001.pdf [file HEP-71-1198-s001.pdf]

**Supplementary appendix**

**Supplement to: Stephen A. Harrison et al., NGM282 Improves Liver Fibrosis and Histology in 12 Weeks in Patients with Nonalcoholic Steatohepatitis**

Corresponding Author:

Stephen A. Harrison, MD; Radcliffe Department of Medicine, University of Oxford, United Kingdom; and Pinnacle Clinical Research, 5109 Medical Drive, Suite 316, San Antonio, TX 78229; Phone: (210) 982-0320 Ext 1457; Email: [stephenharrison87@gmail.com](mailto:stephenharrison87@gmail.com)

## SUPPLEMENTARY APPENDIX

|                                                                                                                                                               |    |
|---------------------------------------------------------------------------------------------------------------------------------------------------------------|----|
| SUPPLEMENTARY APPENDIX .....                                                                                                                                  | 2  |
| Supplemental Figures .....                                                                                                                                    | 3  |
| Supplementary Fig. S1. Trial profile.....                                                                                                                     | 3  |
| Supplementary Fig. S2. Distributions of total NAS scores at baseline and week 12. ....                                                                        | 4  |
| Supplementary Fig. S3. GGT and ALP over time.....                                                                                                             | 5  |
| Supplementary Fig. S4. Rosuvastatin co-administration in the NGM282 1 mg and 3 mg groups.....                                                                 | 6  |
| Supplemental Tables.....                                                                                                                                      | 7  |
| Supplementary Table S1. List of patients who were not included in the modified intention-to-treat (mITT) analysis.....                                        | 7  |
| Supplementary Table S2. Sensitivity analysis of changes from baseline to week 12 in key outcomes using Wilcoxon matched-pairs test.....                       | 8  |
| Supplementary Table S3. Sensitivity analysis of changes from baseline to week 12 in histological outcomes in the NGM282 1 mg group excluding 6 patients ..... | 9  |
| Supplementary Table S4. Sensitivity analysis of changes from baseline to week 12 in histological outcomes in the NGM282 3 mg group excluding 3 patients ..... | 10 |
| Supplementary Table S5. Between group differences of change from baseline to week 12 in C4 and liver fat content.....                                         | 11 |

## Supplemental Figures

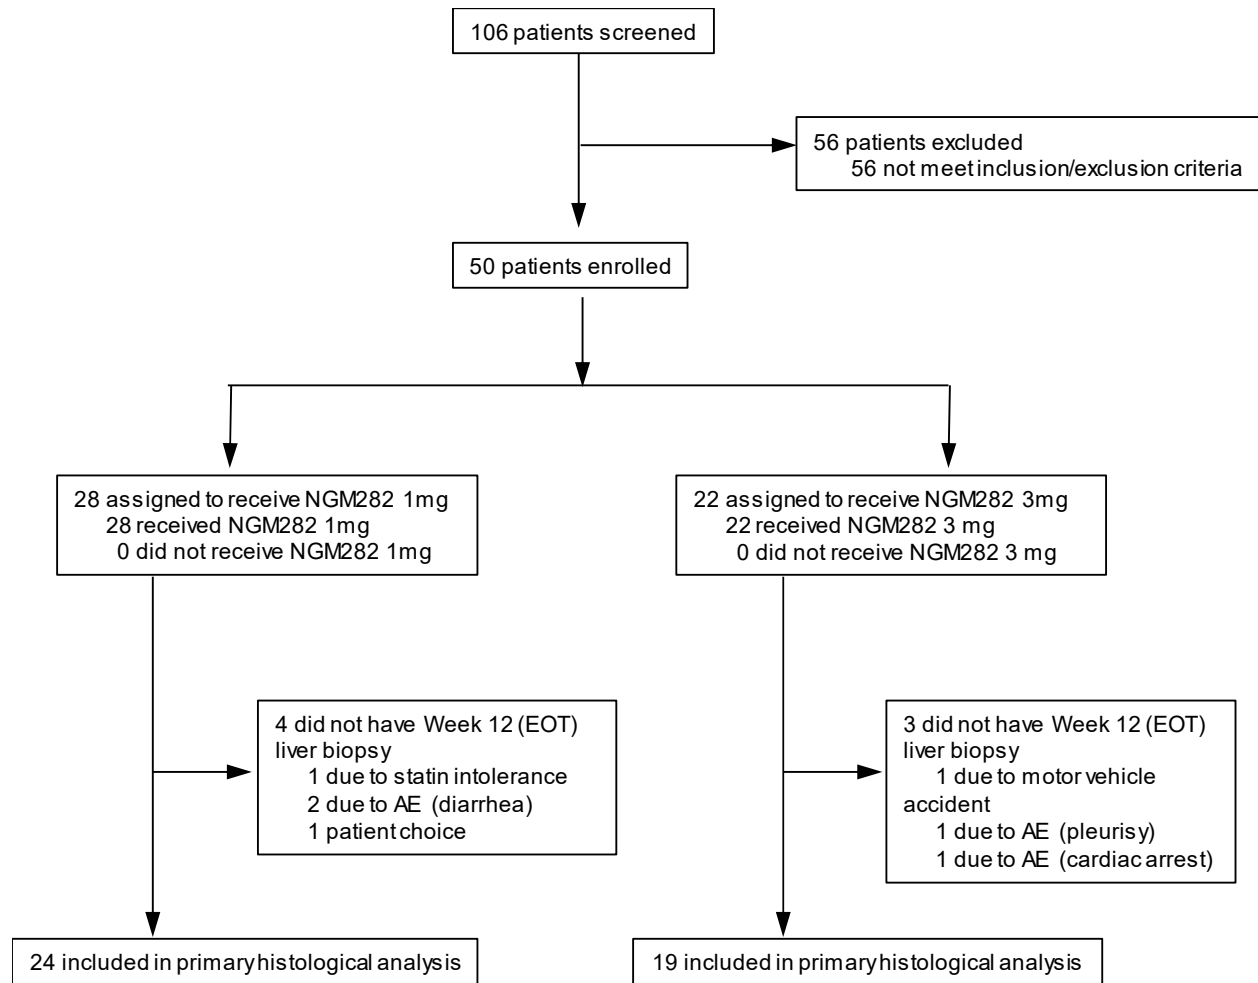

### Supplementary Fig. S1. Trial profile.

AE, adverse event; EOT, end of treatment

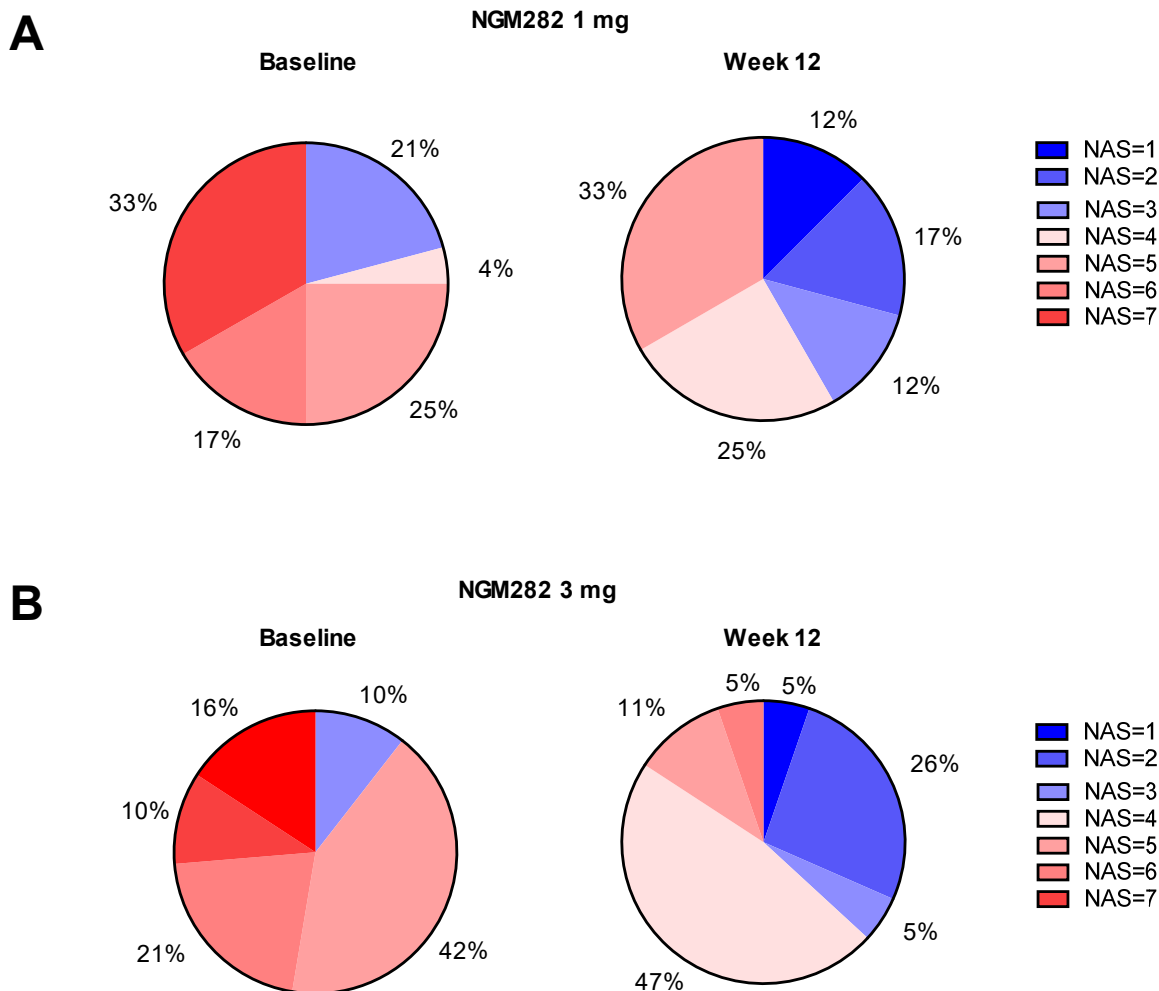

**Supplementary Fig. S2. Distributions of total NAS scores at baseline and week 12.**

(A) Distributions of total NAS scores at baseline and week 12 in the NGM282 1 mg group. (B) Distributions of total NAS scores at baseline and week 12 in the NGM282 3 mg group. Proportions of patients with total NAS scores of 1-7 are presented. No patients had a NAS score of 0 or 8 at baseline or week 12. NAS, nonalcoholic fatty liver disease activity score.

**A**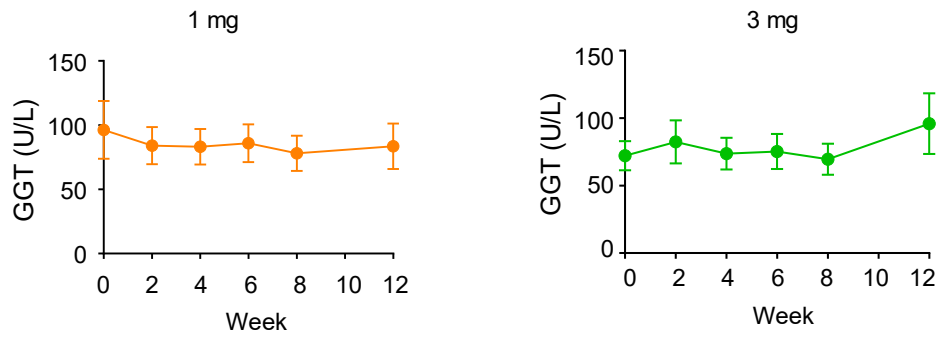**B**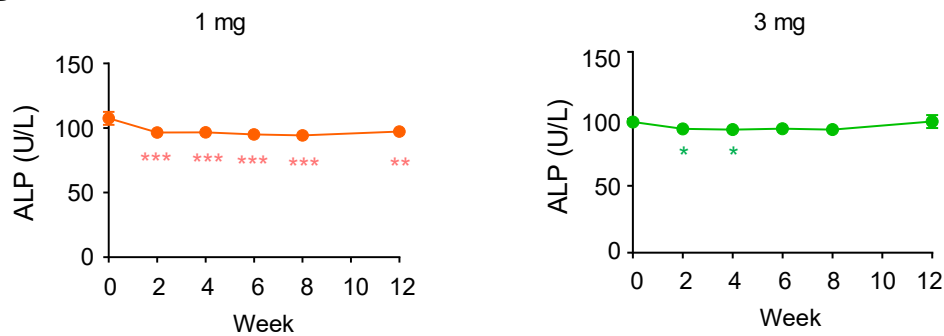

### Supplementary Fig. S3. GGT and ALP over time

(A) Serum concentrations of GGT over time. (B) Serum concentrations of ALP over time. Panels show the concentrations of GGT and ALP measured at baseline, weeks 2, 4, 6, 8 and 12 in patients treated with NGM282 1 mg or 3 mg. ALP, alkaline phosphatase; GGT, gamma-glutamyl transferase. \*\*\* $P < 0.001$ , \*\* $P < 0.01$ , \* $P < 0.05$  vs baseline by one-sample t-test.

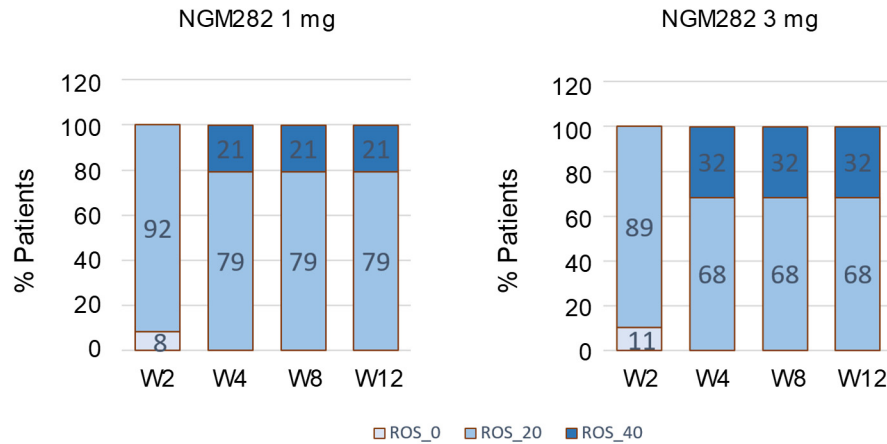

**Supplementary Fig. S4. Rosuvastatin co-administration in the NGM282 1 mg and 3 mg groups**

Patients received NGM282 at a dose of 1 mg or 3 mg per day subcutaneously for 2 weeks, before the biweekly dose escalation of rosuvastatin to a target dose of 40 mg per day began. Patients underwent lipid management according to the algorithm (Rinella et al., J Hepatology 2018). A value of 100% represents all participants who had paired liver biopsies in each dose group. Shown are proportions of patients with rosuvastatin co-administration at weeks 2, 4, 8 and 12. Percentages may not total 100 because of rounding. ROS\_0, no rosuvastatin; ROS\_20, rosuvastatin 20 mg; ROS\_40, rosuvastatin 40 mg.

## Supplemental Tables

**Supplementary Table S1. List of patients who were not included in the modified intention-to-treat (mITT) analysis**

| Patient ID         | First Biopsy at Baseline | Second Biopsy at Week 12 | Reason                                                                                    |
|--------------------|--------------------------|--------------------------|-------------------------------------------------------------------------------------------|
| <b>NGM282 1 mg</b> |                          |                          |                                                                                           |
| 1 mg WD#1          | Yes                      | No                       | Patients declined second biopsy due to statin intolerance                                 |
| 1 mg WD#2          | Yes                      | No                       | Patient withdrew consent, no longer wanted to participate in the trial                    |
| 1 mg WD#3          | Yes                      | No                       | Patient discontinued study drug on Day 33 due to adverse event (diarrhea)                 |
| 1 mg WD#4          | Yes                      | No                       | Patient discontinued study drug on Day 29 due to adverse event (diarrhea)                 |
| <b>NGM282 3 mg</b> |                          |                          |                                                                                           |
| 3 mg WD#1          | Yes                      | No                       | Patient discontinued study drug on Day 50 due to a motor vehicle accident                 |
| 3 mg WD#2          | Yes                      | No                       | Patient discontinued study drug on Day 28 due to a serious adverse event (pleurisy)       |
| 3 mg WD#3          | Yes                      | No                       | Patient discontinued study drug on Day 28 due to a serious adverse event (cardiac arrest) |

**Supplementary Table S2. Sensitivity analysis of changes from baseline to week 12 in key outcomes using Wilcoxon matched-pairs test**

|                                           | NGM282 1 mg (n=24)              |        | NGM282 3 mg (n=19)              |        |
|-------------------------------------------|---------------------------------|--------|---------------------------------|--------|
|                                           | Change from Baseline to Week 12 | P      | Change from Baseline to Week 12 | P      |
| <b>Histology</b>                          |                                 |        |                                 |        |
| <b>Total NAS score</b>                    | -2 (-2.6, -1.2)                 | <0.001 | -2 (-3.1, -1.3)                 | <0.001 |
| <i>Baseline NAS 3-6</i>                   | -1 (-2.1, -0.4)                 | 0.008  | -1.5 (-2.3, -0.7)               | 0.003  |
| <i>Baseline NAS 7-8</i>                   | -3 (-4.1, -2.2)                 | 0.008  | -4 (-6.0, -2.4)                 | 0.06   |
| <b>Steatosis</b>                          | -1 (-1.4, -0.7)                 | <0.001 | -1 (-1.5, -0.7)                 | <0.001 |
| <b>Ballooning</b>                         | 0 (-0.8, 0)                     | 0.044  | -1 (-1.1, -0.2)                 | 0.008  |
| <b>Inflammation</b>                       | 0 (-0.6, -0.1)                  | 0.008  | 0 (-0.8, -0.1)                  | 0.031  |
| <b>Total Fibrosis score</b>               | 0 (-0.4, 0.2)                   | 0.59   | 0 (-0.9, -0.04)                 | 0.057  |
| <i>Baseline F1</i>                        | 0.5 (-0.4, 1.4)                 |        | 0 (-1.1, 1.8)                   |        |
| <i>Baseline F2</i>                        | 0 (-0.8, 0.4)                   |        | 0 (-1.1, 0.3)                   |        |
| <i>Baseline F3</i>                        | 0 (-0.6, 0.1)                   |        | -0.5 (-1.4, 0)                  |        |
| <i>Baseline F4</i>                        | -1                              |        | -1                              |        |
| <b>Imaging</b>                            |                                 |        |                                 |        |
| <b>Liver fat content by MRI-PDFF (%)</b>  | -10.2 (-13.0, -8.8)             | <0.001 | -10.4 (-13.3, -9.2)             | <0.001 |
| <b>cT1 by LiverMultiScan</b>              | -76 (-102.6, -53.2)             | <0.001 | -72 (-110.1, -53.1)             | <0.001 |
| <b>Serum markers of target engagement</b> |                                 |        |                                 |        |
| <b>C4 (ng/mL)</b>                         | -19.6 (-43.9, -17.9)            | <0.001 | -28.1 (-45.0, -21.4)            | <0.001 |
| <b>Total bile acids (µmol/L)</b>          | -2.4 (-5.7, -1.5)               | <0.001 | -3.6 (-5.5, -2.4)               | <0.001 |
| <b>Liver enzymes</b>                      |                                 |        |                                 |        |
| <b>ALT (U/L)</b>                          | -49 (-81.5, -46.1)              | <0.001 | -47 (-70.2, -35.6)              | <0.001 |
| <b>AST (U/L)</b>                          | -38 (-56.7, -28.2)              | <0.001 | -35 (-50.0, -24.8)              | <0.001 |
| <b>Serum fibrosis markers</b>             |                                 |        |                                 |        |
| <b>Pro-C3 (ng/mL)</b>                     | -2.6 (-7.5, -1.5)               | <0.001 | -6.5 (-19.9, -2.2)              | 0.001  |
| <b>ELF score</b>                          | -0.3 (-0.5, -0.2)               | <0.001 | -0.7 (-0.8, -0.3)               | <0.001 |
| <i>Hyaluronic acid (UG/L)</i>             | -2.5 (-11.0, 12.4)              | 0.77   | -5 (-43.6, 5.1)                 | 0.12   |
| <i>PIIINP (UG/L)</i>                      | -2.4 (-4.6, -1.5)               | <0.001 | -3.7 (-4.7, -1.3)               | 0.002  |
| <i>TIMP-1 (UG/L)</i>                      | -40 (-51.6, -27.7)              | <0.001 | -37 (-58.9, -18.7)              | <0.001 |

Shown are median (95% CI). P values by Wilcoxon matched-pairs signed rank test.

ALT, alanine aminotransferase; AST, aspartate aminotransferase; CI, confidence interval; ELF, enhanced liver fibrosis; MRI-PDFF, magnetic resonance imaging- proton density fat fraction; NAS, nonalcoholic fatty liver disease activity score; PIIINP, N-terminal pro-peptide of collagen III; Pro-C3, neoepitope-specific N-terminal pro-peptide of type III collagen; SD, standard deviation; TIMP-1, tissue inhibitor of metalloproteinase 1



**Supplementary Table S3. Sensitivity analysis of changes from baseline to week 12 in histological outcomes in the NGM282 1 mg group excluding 6 patients**

|                                                                     | NGM282 1 mg (n=18) |           |                                 |        |
|---------------------------------------------------------------------|--------------------|-----------|---------------------------------|--------|
|                                                                     | Baseline           | Week 12   | Change from Baseline to Week 12 | P      |
| <b>Histology</b>                                                    |                    |           |                                 |        |
| <b>Total NAS score</b>                                              | 6.0 (1.0)          | 3.7 (1.4) | -2.3 (1.6)                      | <0.001 |
| <i>Baseline NAS 4-6</i>                                             | 5.3 (0.6)          | 3.6 (1.6) | -1.6 (1.5)                      | 0.005  |
| <i>Baseline NAS 7-8</i>                                             | 7.0 (0)            | 3.9 (1.1) | -3.1 (1.1)                      | <0.001 |
| <b>Steatosis</b>                                                    | 2.2 (0.9)          | 0.9 (0.5) | -1.3 (0.8)                      | <0.001 |
| <b>Ballooning</b>                                                   | 1.7 (0.5)          | 1.1 (0.9) | -0.6 (0.8)                      | 0.007  |
| <b>Inflammation</b>                                                 | 2.0 (0.4)          | 1.7 (0.5) | -0.3 (0.5)                      | 0.010  |
| <b>Total Fibrosis score</b>                                         | 2.3 (0.7)          | 2.2 (0.9) | -0.1 (0.8)                      | 0.54   |
| <i>Baseline F1</i>                                                  | 1.0 (0)            | 1.5 (0.7) | 0.5 (0.7)                       |        |
| <i>Baseline F2</i>                                                  | 2.0 (0)            | 1.9 (1.0) | -0.1 (1.0)                      |        |
| <i>Baseline F3</i>                                                  | 3.0 (0)            | 2.8 (0.5) | -0.2 (0.5)                      |        |
| <b>Histological Response</b>                                        |                    | 10 (56%)  |                                 |        |
| <i>NAS<math>\geq</math>2 reduction without fibrosis worsening</i>   |                    | 11 (61%)  |                                 |        |
| <i>Fibrosis <math>\geq</math>1 reduction without NASH worsening</i> |                    | 4 (22%)   |                                 |        |
| <i>NASH resolution without fibrosis worsening</i>                   |                    | 3 (17%)   |                                 |        |

6 patients in the NGM282 1 mg cohort who no longer met inclusion criteria (NAS $\geq$ 4, with  $\geq$ 1 in each component; F1-F3) upon central pathology review were excluded for this sensitivity analysis. Among the 6 patients, 1 had F4, 5 had NAS=3 (4 of the 5 had no ballooning) in the baseline biopsies upon central read.

Shown are mean (SD) or n (%). P values by one-sample t-test. Histological response is defined as 2-point or greater improvement in NAS without worsening of fibrosis, or improvement in fibrosis of 1-stage or more without worsening of NASH (defined as no increase in NAS for ballooning, inflammation or steatosis). Resolution of NASH is defined as a score of 0–1 for inflammation, 0 for ballooning, and any value for steatosis.

NAS, nonalcoholic fatty liver disease activity score; SD, standard deviation

**Supplementary Table S4. Sensitivity analysis of changes from baseline to week 12 in histological outcomes in the NGM282 3 mg group excluding 3 patients**

|                                                                     | NGM282 3 mg (n=16) |           |                                 |        |
|---------------------------------------------------------------------|--------------------|-----------|---------------------------------|--------|
|                                                                     | Baseline           | Week 12   | Change from Baseline to Week 12 | P      |
| <b>Histology</b>                                                    |                    |           |                                 |        |
| <b>Total NAS score</b>                                              | 6.1 (1.2)          | 3.4 (1.3) | -2.6 (1.6)                      | <0.001 |
| <i>Baseline NAS 4-6</i>                                             | 5.4 (0.5)          | 3.4 (1.4) | -1.9 (1.1)                      | <0.001 |
| <i>Baseline NAS 7-8</i>                                             | 7.6 (0.5)          | 3.4 (1.3) | -4.2 (1.5)                      | 0.003  |
| <b>Steatosis</b>                                                    | 1.8 (0.8)          | 0.5 (0.5) | -1.2 (0.8)                      | <0.001 |
| <b>Ballooning</b>                                                   | 1.9 (0.2)          | 1.1 (0.8) | -0.9 (0.8)                      | <0.001 |
| <b>Inflammation</b>                                                 | 2.4 (0.6)          | 1.8 (0.5) | -0.6 (0.8)                      | 0.014  |
| <b>Total Fibrosis score</b>                                         | 2.6 (0.6)          | 2.0 (1.0) | -0.6 (0.9)                      | 0.024  |
| <i>Baseline F1</i>                                                  | 1.0 (0)            | 1.0 (0)   | 0 (0)                           |        |
| <i>Baseline F2</i>                                                  | 2.0 (0)            | 1.6 (0.5) | -0.4 (0.5)                      |        |
| <i>Baseline F3</i>                                                  | 3.0 (0)            | 2.3 (1.0) | -0.7 (1.0)                      |        |
| <b>Histological Response</b>                                        |                    | 12 (75%)  |                                 |        |
| <i>NAS<math>\geq</math>2 reduction without fibrosis worsening</i>   |                    | 12 (75%)  |                                 |        |
| <i>Fibrosis <math>\geq</math>1 reduction without NASH worsening</i> |                    | 7 (44%)   |                                 |        |
| <i>NASH resolution without fibrosis worsening</i>                   |                    | 2 (12%)   |                                 |        |

3 patients in the NGM282 3 mg cohort who no longer met inclusion criteria (NAS $\geq$ 4, with  $\geq$ 1 in each component; F1-F3) upon central pathology review were excluded for this sensitivity analysis. Among the 3 patients, 1 had F4, 2 had NAS=3 (1 of the 2 had no ballooning) in the baseline biopsies upon central read.

Shown are mean (SD) or n (%). P values by one-sample t-test. Histological response is defined as 2-point or greater improvement in NAS without worsening of fibrosis, or improvement in fibrosis of 1-stage or more without worsening of NASH (defined as no increase in NAS for ballooning, inflammation or steatosis). Resolution of NASH is defined as a score of 0–1 for inflammation, 0 for ballooning, and any value for steatosis.

NAS, nonalcoholic fatty liver disease activity score; SD, standard deviation

**Supplementary Table S5. Between group differences of change from baseline to week 12 in C4 and liver fat content**

|                            | <b>LS mean Differences (95% CI) in Change from Baseline to Week 12</b> |          |
|----------------------------|------------------------------------------------------------------------|----------|
|                            | <b>NGM282 1 mg vs 3 mg</b>                                             | <b>P</b> |
| <b>C4 (ng/mL)</b>          | 5.0 (0.2 to 9.7)                                                       | 0.041    |
| <b>LFC by MRI-PDFF (%)</b> | 1.2 (-1.1 to 3.4)                                                      | 0.30     |

To compare across treatment groups in changes from baseline to week 12 (end of treatment), we used analysis of covariance (ANCOVA) with treatment group and baseline value as covariates at the 5% level of significance. CI, confidence interval; LFC, liver fat content; LS, least squares; MRI-PDFF, magnetic resonance imaging- proton density fat fraction
